# Supplementary material
Source: Springer Nature journal article supplement (https://www.springermedizin.de/resource/supplementary/12889_2014_6689_MOESM3_ESM.pdf/9498890)
Supplement: MOESM3 [file 9498890]

## Views about non-pharmaceutical interventions

- Perceived Benefits**
- † Familiar
  - † Reduces social stigma
  - † Socially responsible
- Perceived Disadvantages**
- Irrelevant to me
  - Attracts social stigma
  - Negative impacts

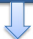

## Views about respiratory infections and emerging outbreaks

Personal/cultural beliefs about infection transmission

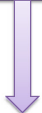

Diagnostic uncertainty in emerging infections

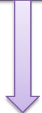

Perceived vulnerability to respiratory infection

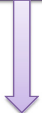

Anxiety about emerging respiratory infections

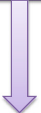

Communications about emerging respiratory infections

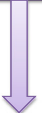

## Non-pharmaceutical respiratory infection control behaviours
